# Supplementary material for: Syntheses, crystal structures, magnetic properties and ESI-MS studies of a series of trinuclear CuIIMIICuII compounds (M = Cu, Ni, Co, Fe, Mn, Zn)
Source: Royal Society of Chemistry journal article supplement (doi:10.1039/c7ra13763j), 2018-01-01
Supplement: c7ra13763j1.pdf [file c7ra13763j1.pdf]

## **Electronic Supplementary Informations**

**For**

**Syntheses, crystal structures, magnetic properties and ESI-MS studies of a series of trinuclear  $\text{Cu}^{\text{II}}\text{M}^{\text{II}}\text{Cu}^{\text{II}}$  compounds (M = Cu, Ni, Co, Fe, Mn, Zn)**

**Nairita Hari, Shuvankar Mandal, Arpita Jana, Hazel A. Sparkes, Sasankasekhar Mohanta\***

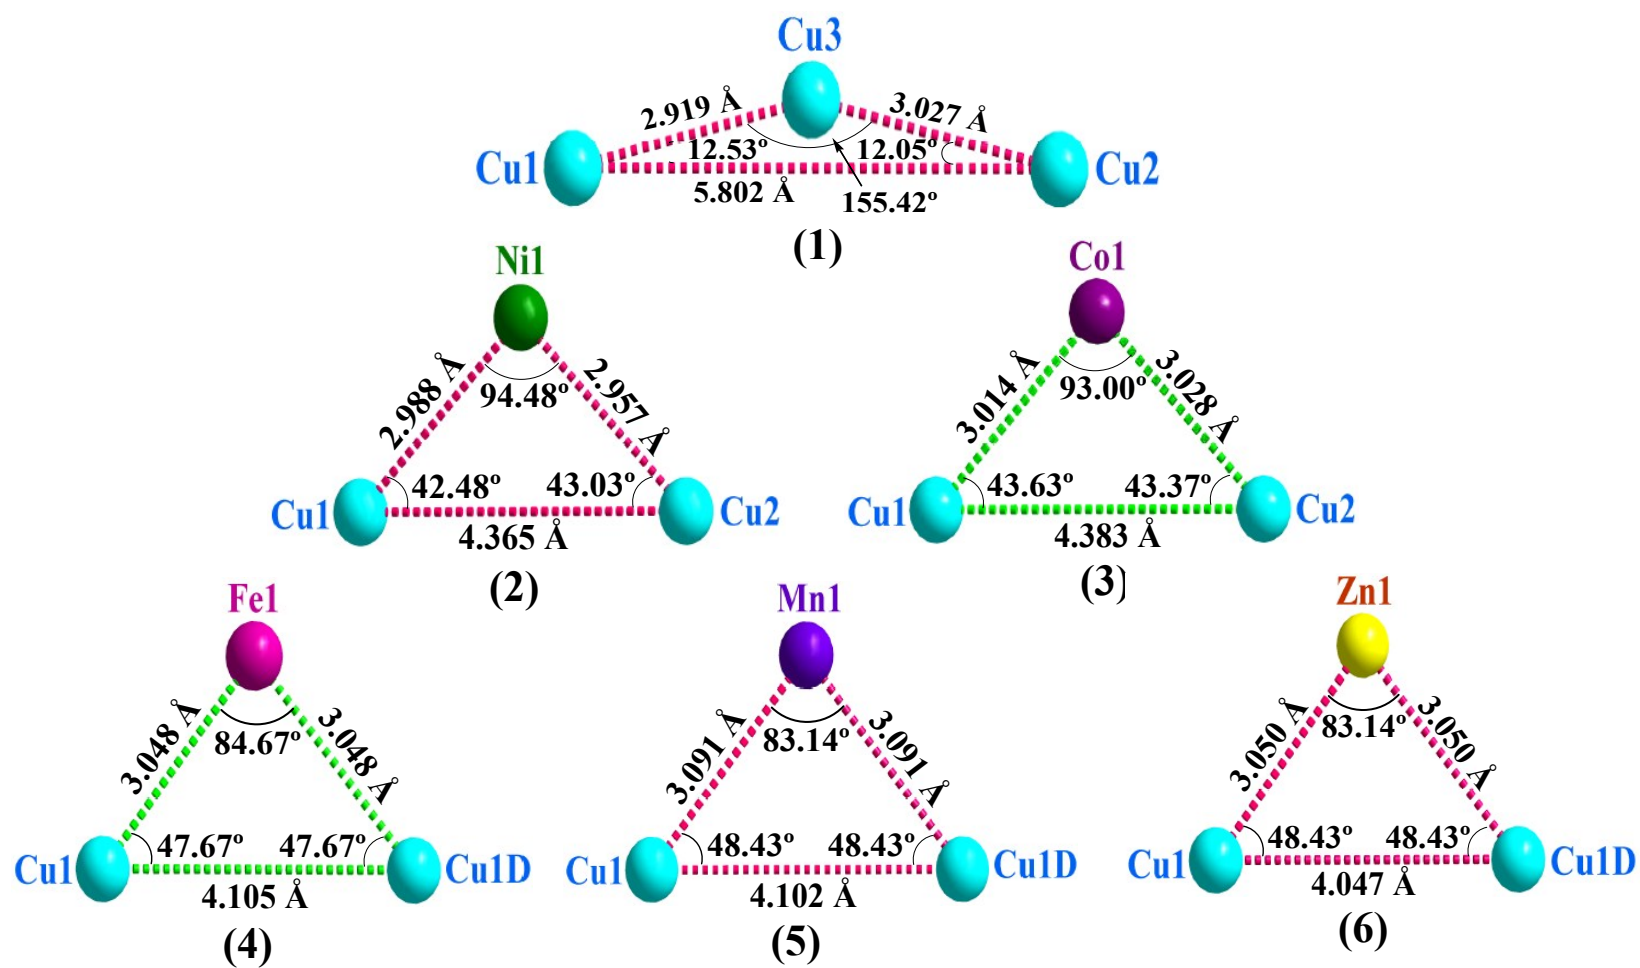

**Scheme S1** The triangular arrangement of the three metal ions in all of 1–6; isosceles in 4–6 and closely isosceles in 1–3.

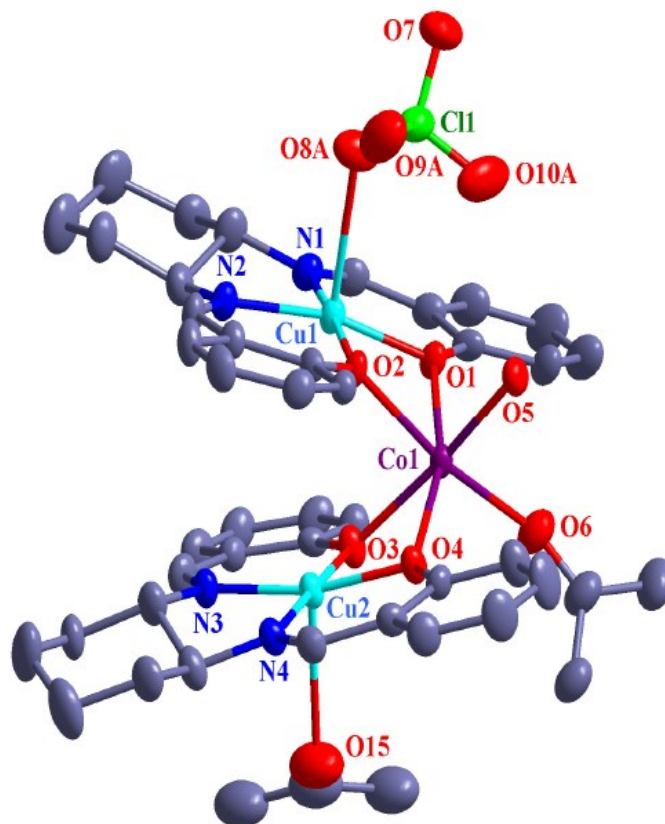

**Fig. S1** ORTEP drawing (ellipsoid probability at 30%) of the structure of  $[\{\text{Cu}^{\text{II}}\text{L}(\text{ClO}_4)\}\{\text{Co}^{\text{II}}(\text{CH}_3\text{COCH}_3)(\text{H}_2\text{O})\}\{\text{Cu}^{\text{II}}\text{L}(\text{CH}_3\text{COCH}_3)\}]\text{ClO}_4$  (**3**). All hydrogen atoms, and one perchlorate anion, are omitted for clarity.

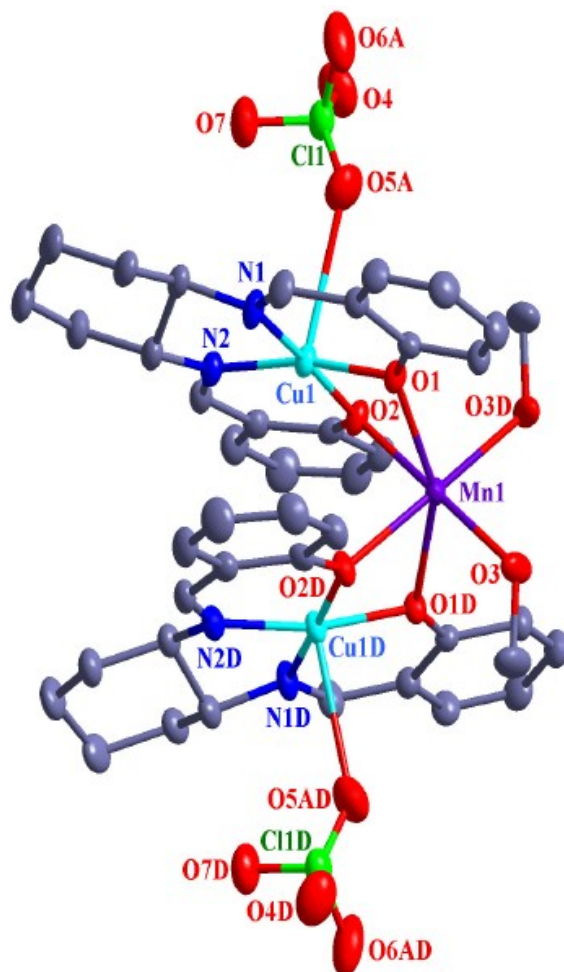

**Fig. S2** ORTEP drawing (ellipsoid probability at 30%) of the structure of  $[\{\text{Cu}^{\text{II}}\text{L}(\text{ClO}_4)\}_2\text{Mn}^{\text{II}}(\text{CH}_3\text{OH})_2]$  (**5**). All hydrogen atoms are omitted for clarity. Symmetry code: D, 2-x, y, 0.5-z.

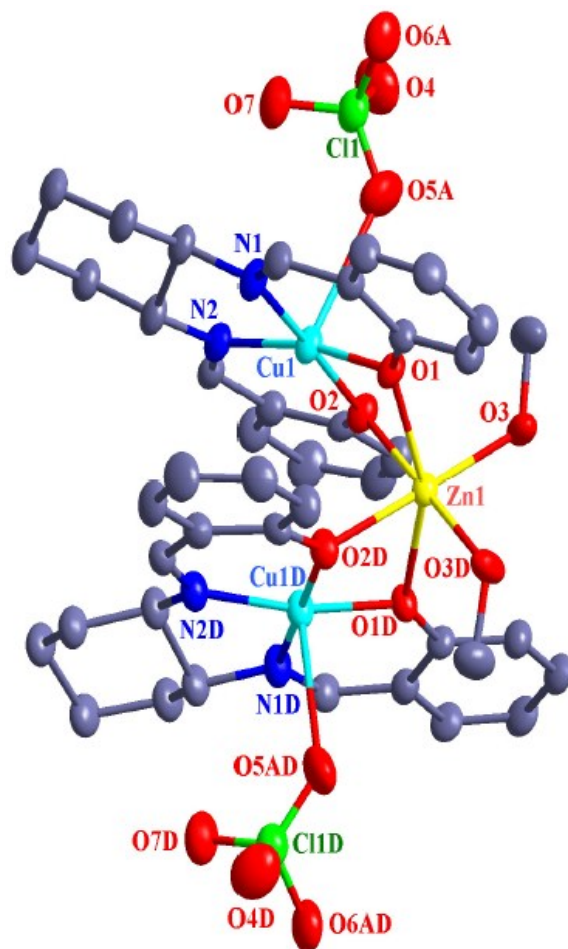

**Fig. S3** ORTEP drawing (ellipsoid probability at 30%) of the structure of  $[\{\text{Cu}^{\text{II}}\text{L}(\text{ClO}_4)\}_2\text{Zn}^{\text{II}}(\text{CH}_3\text{OH})_2]$  (**6**). All hydrogen atoms are omitted for clarity. Symmetry code: D,  $2-x, y, 0.5-z$ .

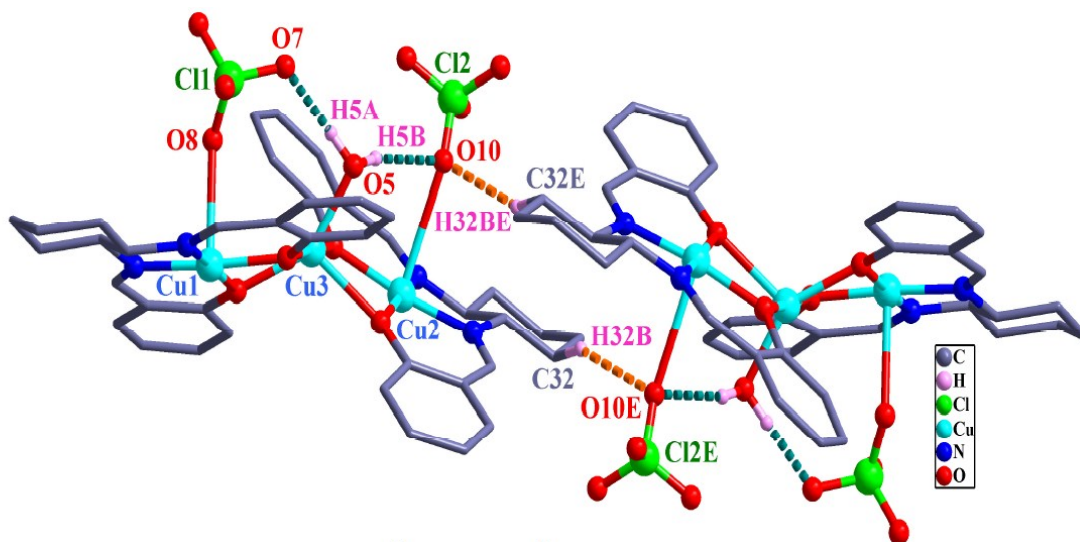

**Fig. S4** Perspective view of  $[\{\text{Cu}^{\text{II}}\text{L}(\text{ClO}_4)\}_2\text{Cu}^{\text{II}}(\text{H}_2\text{O})]\cdot 2\text{H}_2\text{O}$  (**1**), showing the dimer-of-trinuclear type self-assembly. Only those hydrogen atoms which participate in hydrogen bonding interactions are shown. Symmetry: E, 1-x, 2-y, 1-z.

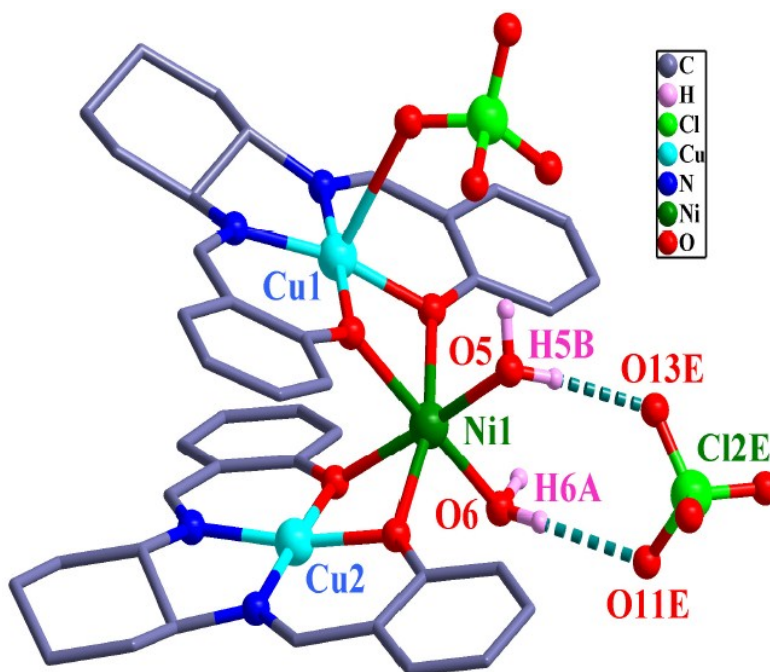

**Fig. S5** Perspective view of  $[\{\text{Cu}^{\text{II}}\text{L}(\text{ClO}_4)\}\{\text{Ni}^{\text{II}}(\text{H}_2\text{O})_2\}\{\text{Cu}^{\text{II}}\text{L}\}]\text{ClO}_4\cdot\text{CH}_3\text{COCH}_3$  (**2**), showing the hydrogen bonding interactions. Only those hydrogen atoms which participate in hydrogen bonding interactions are shown. Symmetry: E, 1-x, y, z.



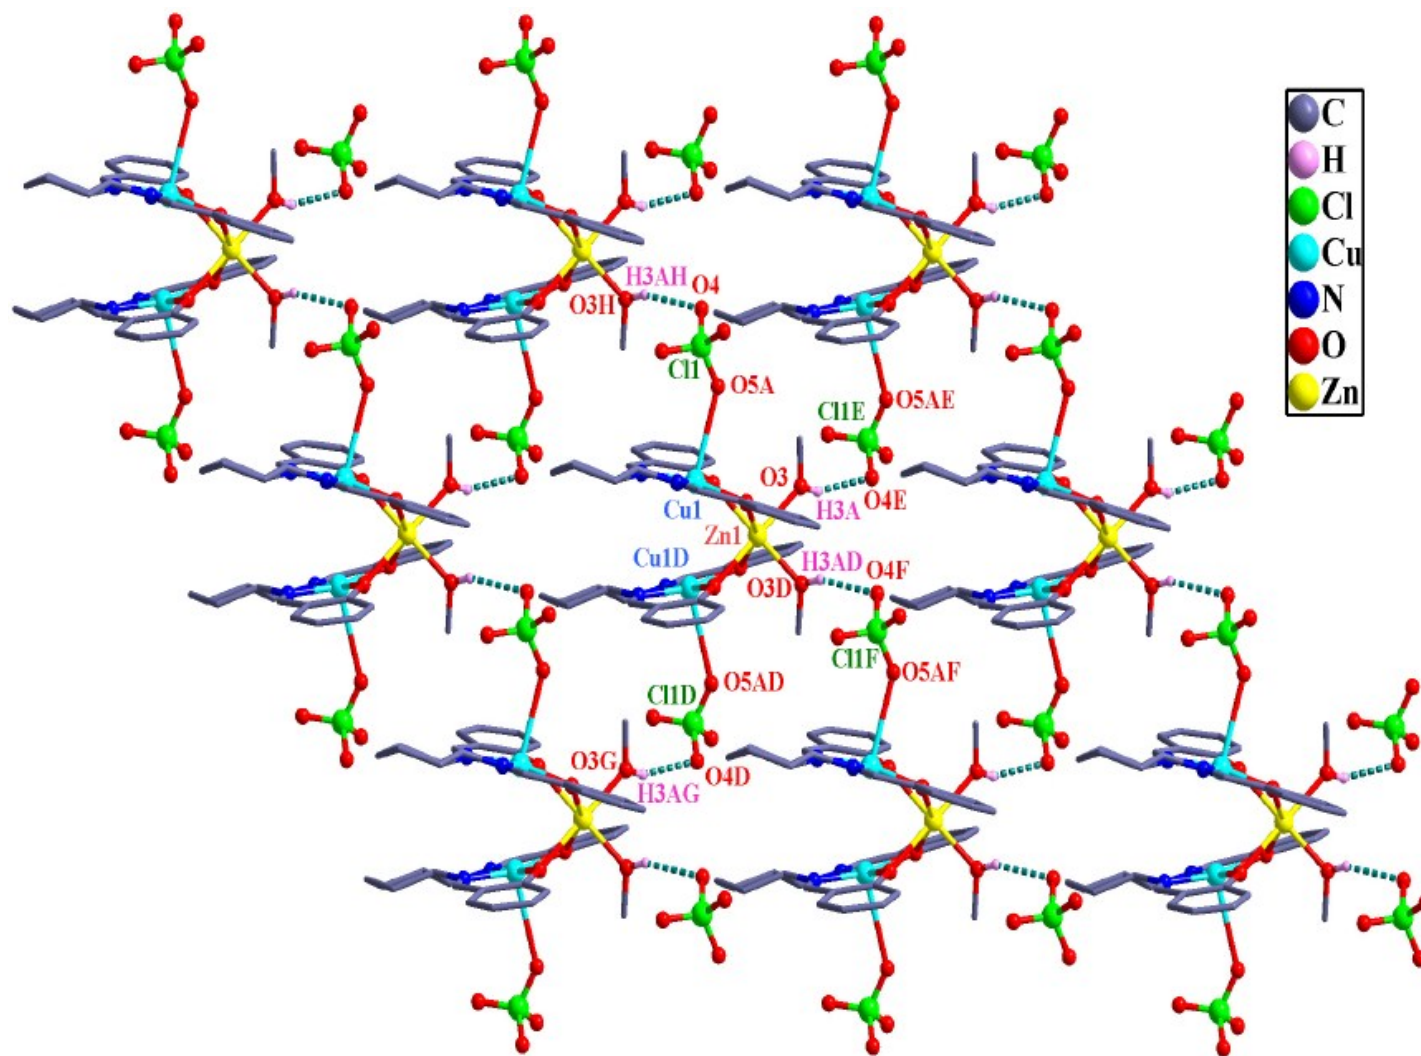

**Fig. S7** Perspective view of the two-dimensional self-assembly in the crystallographic *ab* plane of  $[\{\text{Cu}^{\text{II}}\text{L}(\text{ClO}_4)\}_2\text{Zn}^{\text{II}}(\text{CH}_3\text{OH})_2]$  (6). Only the hydrogen atoms participating in hydrogen bonding interactions are shown. Symmetry: D,  $2-x, y, 0.5-z$ ; E,  $1.5-x, -0.5+y, 0.5-z$ ; F,  $0.5+x, -0.5+y, z$ ; G,  $0.5+x, 0.5+y, z$ ; H,  $1.5-x, 0.5+y, 0.5-z$ .



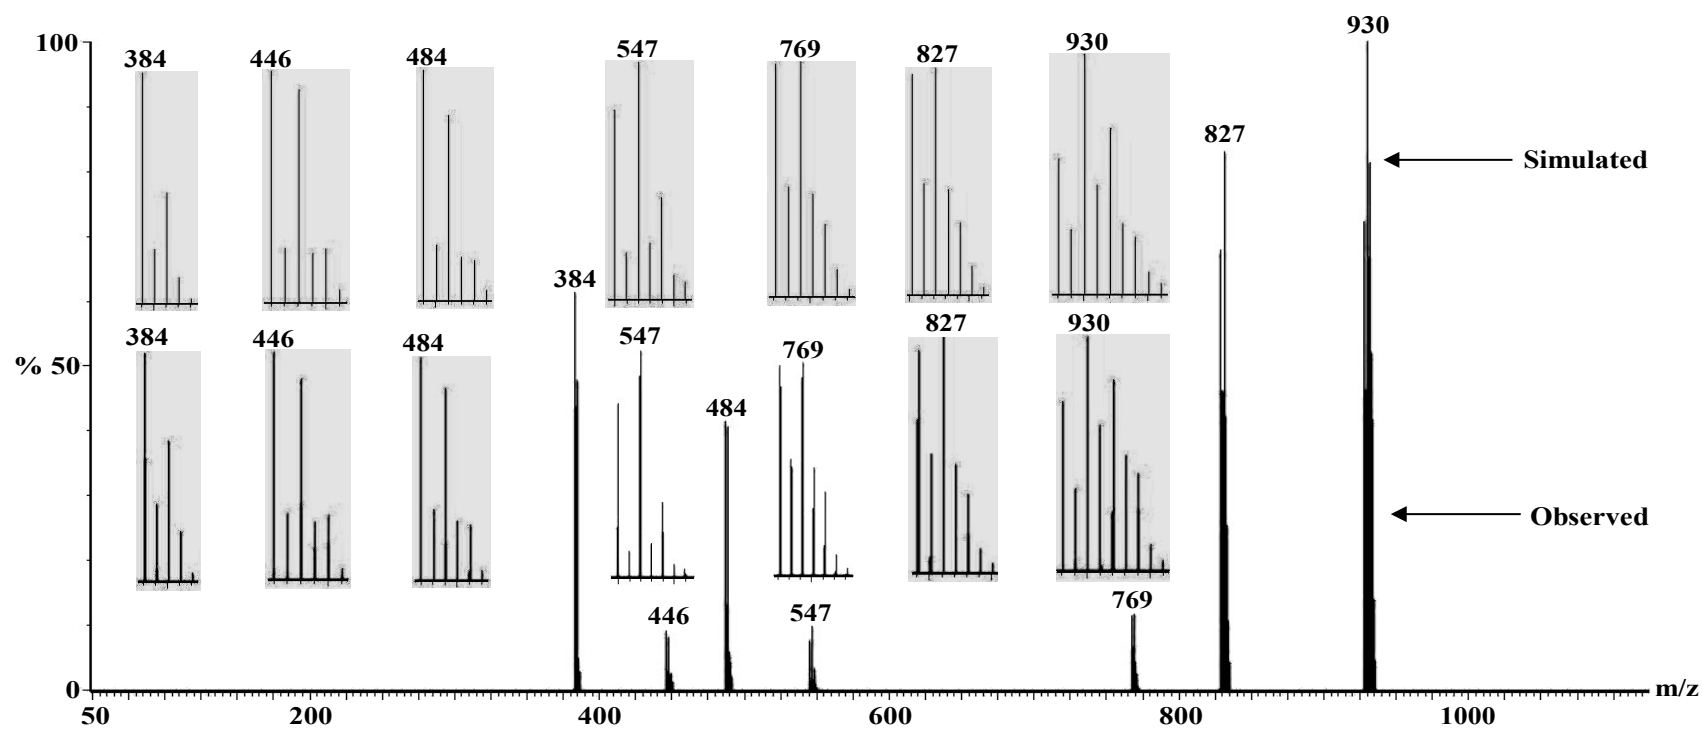

**Fig. S8** Electrospray ionization mass spectrum in positive mode (ESI-MS positive) of  $[\{\text{Cu}^{\text{II}}\text{L}(\text{ClO}_4)\}_2\text{Cu}^{\text{II}}(\text{H}_2\text{O})]\cdot 2\text{H}_2\text{O}$  (1) in methanol, showing observed and simulated isotopic distribution patterns.

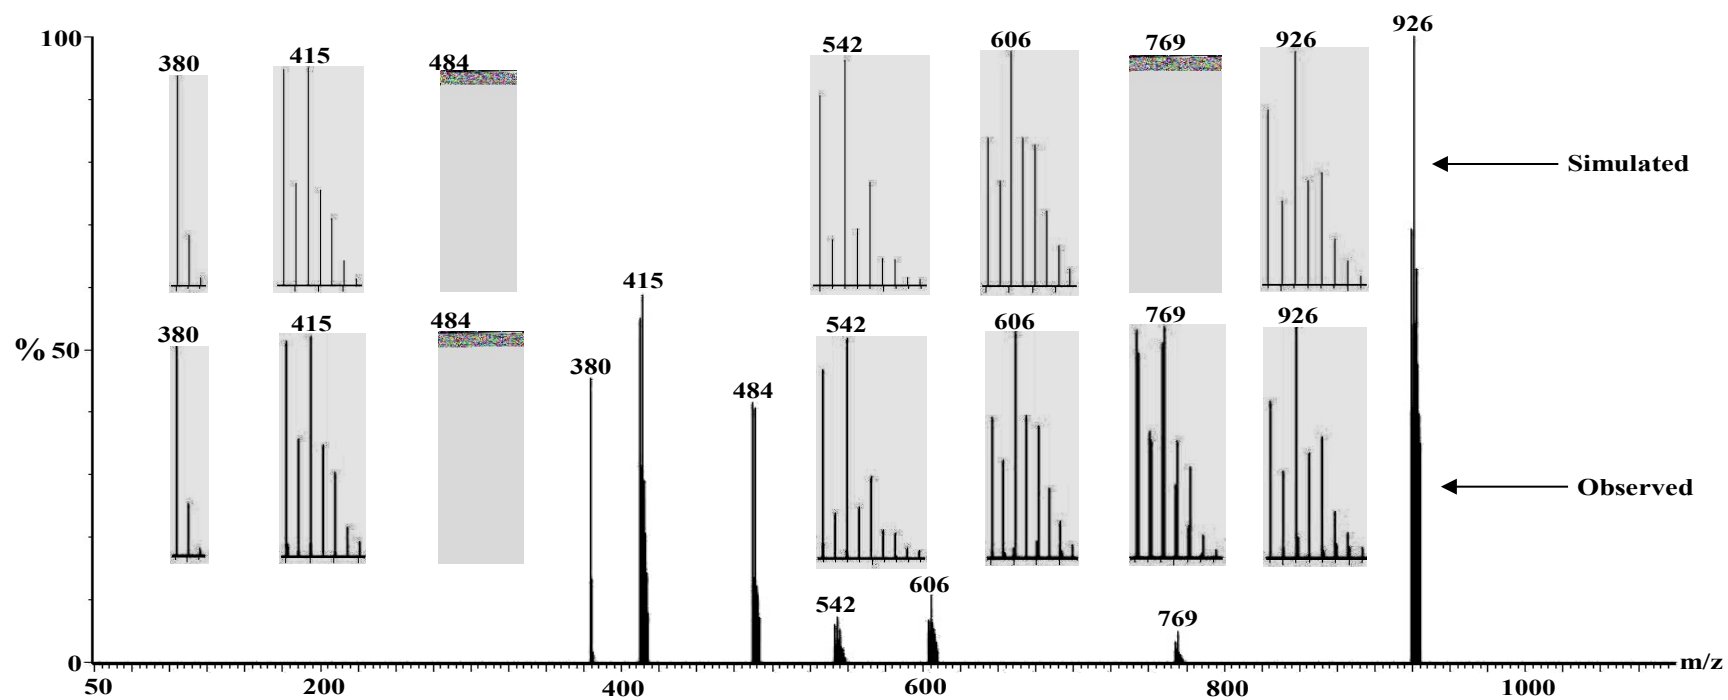

**Fig. S9** Electrospray ionization mass spectrum in positive mode (ESI-MS positive) of  $[\{\text{Cu}^{\text{II}}\text{L}(\text{ClO}_4)\}\{\text{Co}^{\text{II}}(\text{CH}_3\text{COCH}_3)(\text{H}_2\text{O})\}\{\text{Cu}^{\text{II}}\text{L}(\text{CH}_3\text{COCH}_3)\}]\text{ClO}_4$  (**3**) in acetonitrile, showing observed and simulated isotopic distribution patterns.

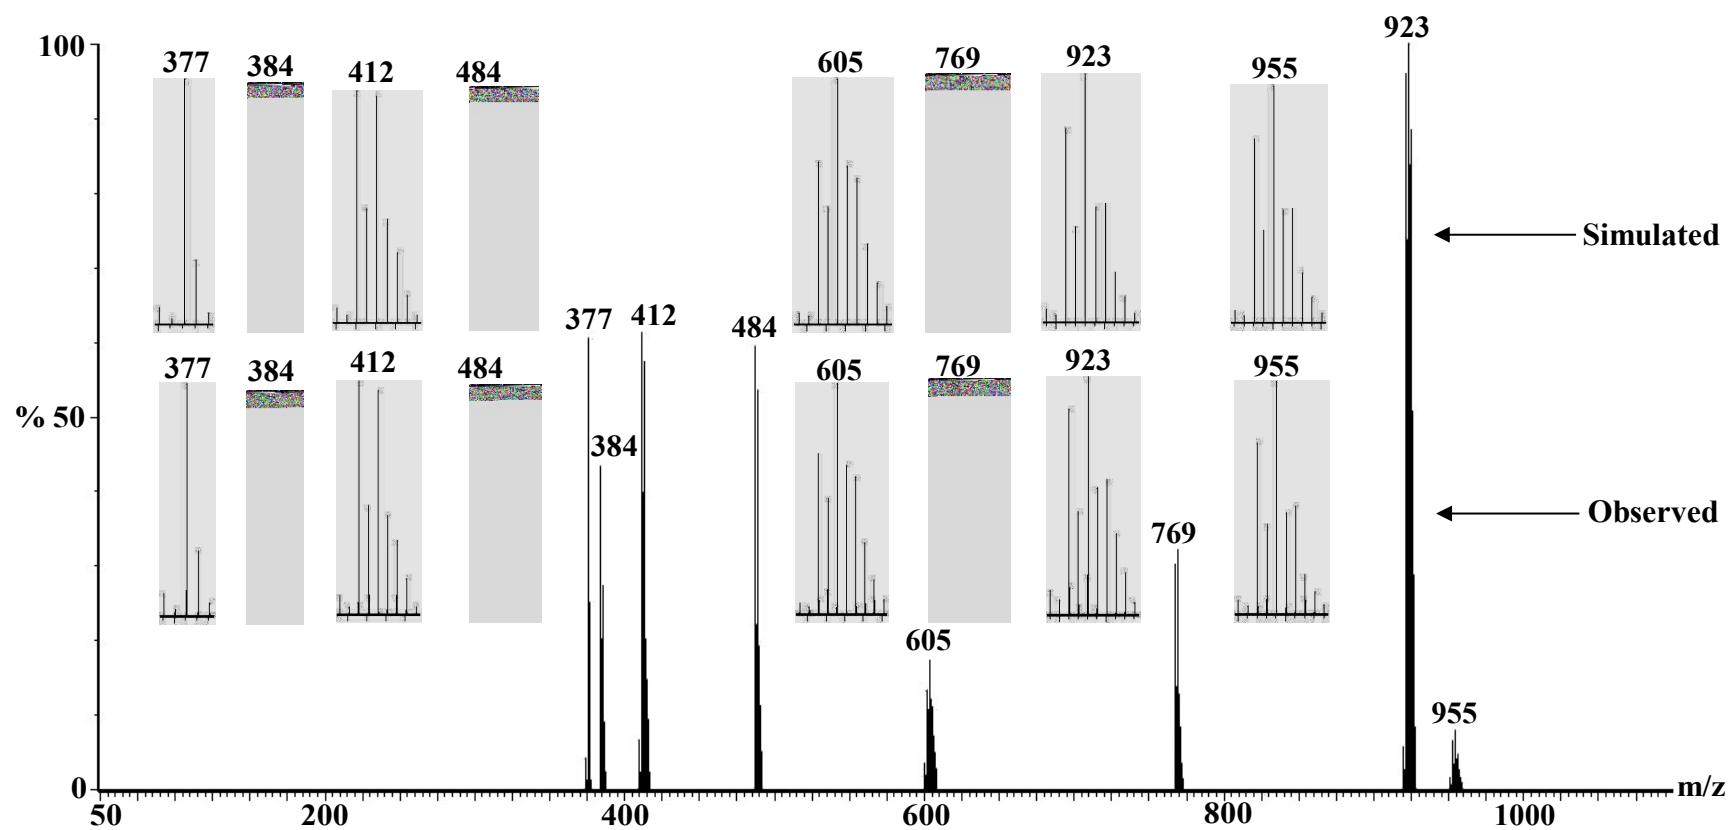

**Fig. S10** Electrospray ionization mass spectrum in positive mode (ESI-MS positive) of  $[\{\text{Cu}^{\text{II}}\text{L}(\text{ClO}_4)_2\}_2\text{Fe}^{\text{II}}(\text{CH}_3\text{OH})_2]$  (4) in acetonitrile, showing observed and simulated isotopic distribution patterns.

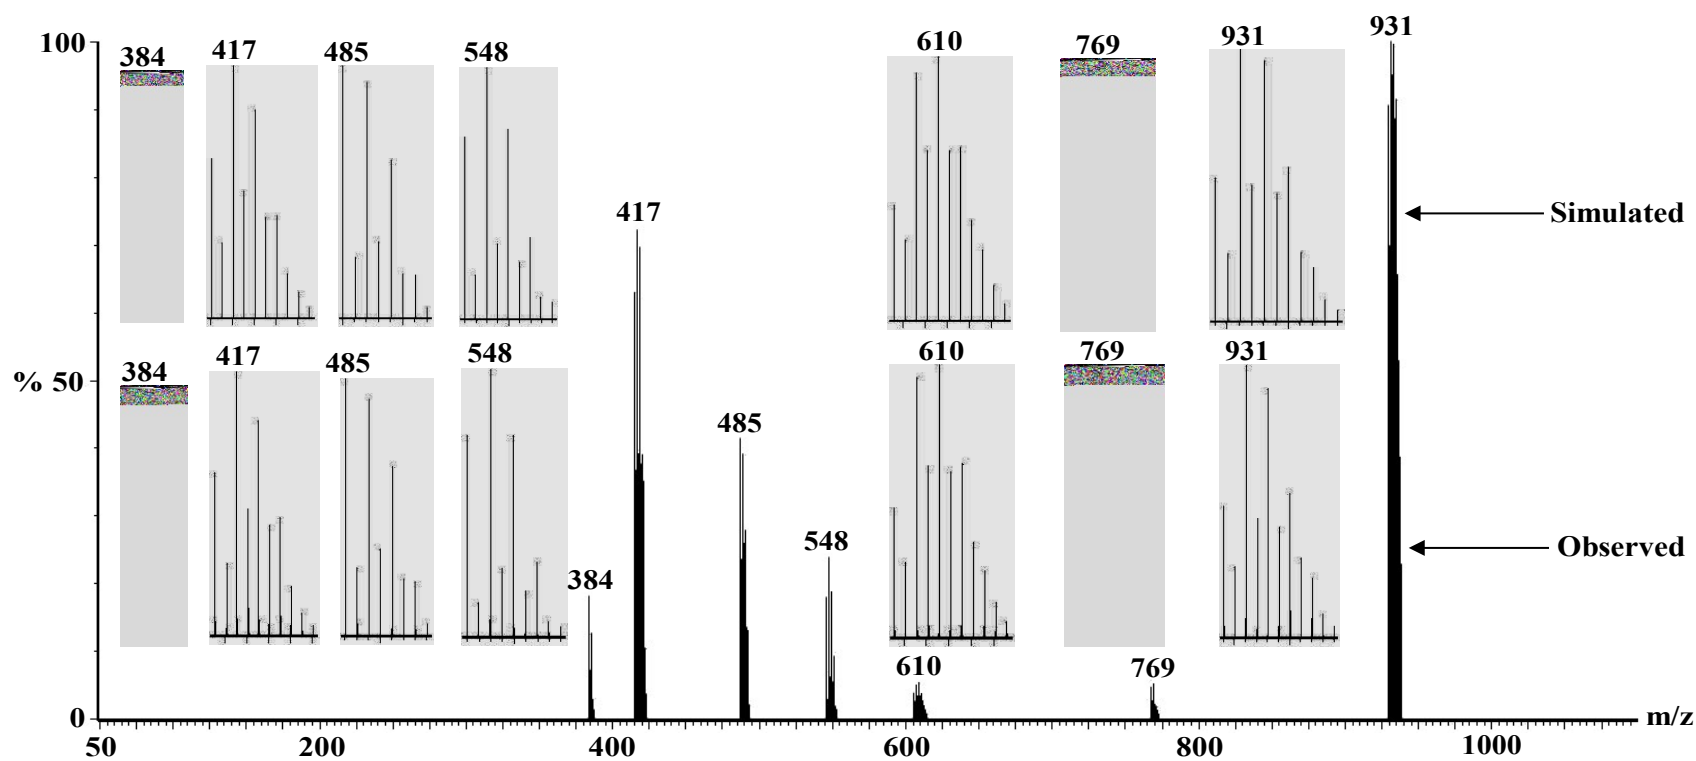

**Fig. S11** Electrospray ionization mass spectrum in positive mode (ESI-MS positive) of  $[\{\text{Cu}^{\text{II}}\text{L}(\text{ClO}_4)\}_2\text{Zn}^{\text{II}}(\text{CH}_3\text{OH})_2]$  (**6**) in acetonitrile, showing observed and simulated isotopic distribution patterns.

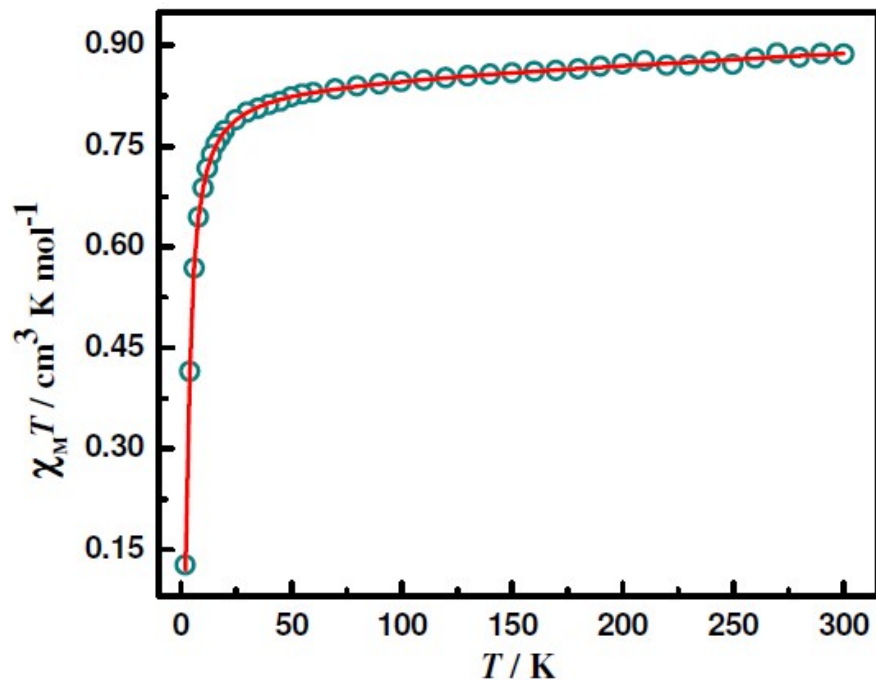

**Fig. S12** Fitting of  $\chi_M T$  versus  $T$  of  $[\{\text{Cu}^{\text{II}}\text{L}(\text{ClO}_4)\}_2\text{Zn}^{\text{II}}(\text{CH}_3\text{OH})_2]$  (**6**) between 2 and 300 K. The experimental data are shown in symbols and the solid lines correspond to the fitted values.

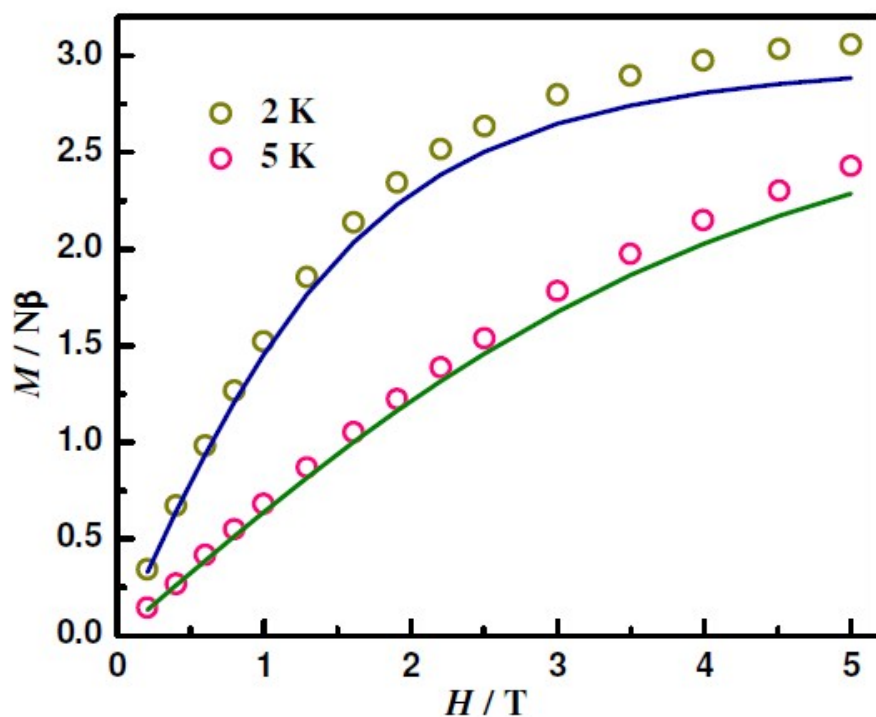

**Fig. S13** Magnetization of  $[\{\text{Cu}^{\text{II}}\text{L}(\text{ClO}_4)\}_2\text{Mn}^{\text{II}}(\text{CH}_3\text{OH})_2]$  (**5**) at the indicated temperatures. The symbols are the experimental data, while the solid lines represent the fitted curves.

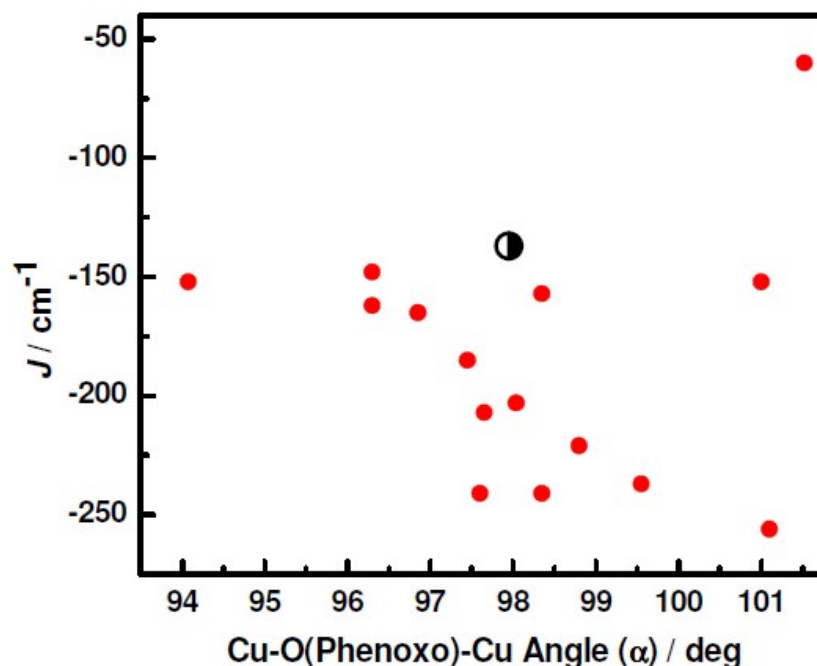

**Fig. S14**  $J$  versus Cu–O(Phenoxo)–Cu bridge angle ( $\alpha$ ) in the trinuclear  $\text{Cu}^{\text{II}}\text{Cu}^{\text{II}}\text{Cu}^{\text{II}}$  compounds where the two copper(II) centres in a  $\text{Cu}^{\text{II}}\cdots\text{Cu}^{\text{II}}$  pair are bridged by solely bis( $\mu_2$ -phenoxo) moiety (Table S5): No straightforward correlation is possible. Red filled circles: Data of previous compounds. Black-white half-filled circle: Data of compound **1**.

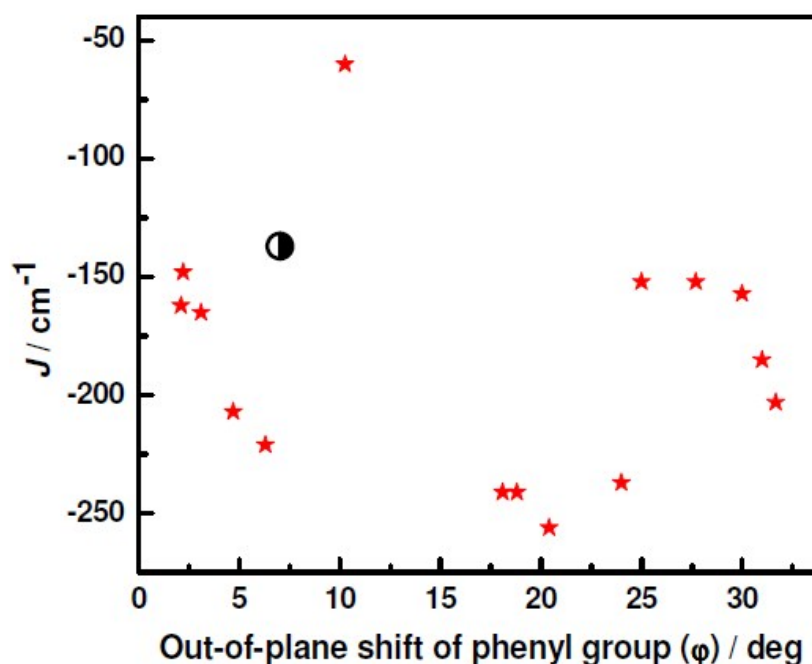

**Fig. S15**  $J$  versus Out-of-plane shift of phenyl group ( $\phi$ ) in the trinuclear  $\text{Cu}^{\text{II}}\text{Cu}^{\text{II}}\text{Cu}^{\text{II}}$  compounds where the two copper(II) centres in a  $\text{Cu}^{\text{II}}\cdots\text{Cu}^{\text{II}}$  pair are bridged by solely bis( $\mu_2$ -phenoxo) moiety (Table S5): No straightforward correlation is possible. Red filled stars: Data of previous compounds. Black-white half-filled circle: Data of compound **1**.

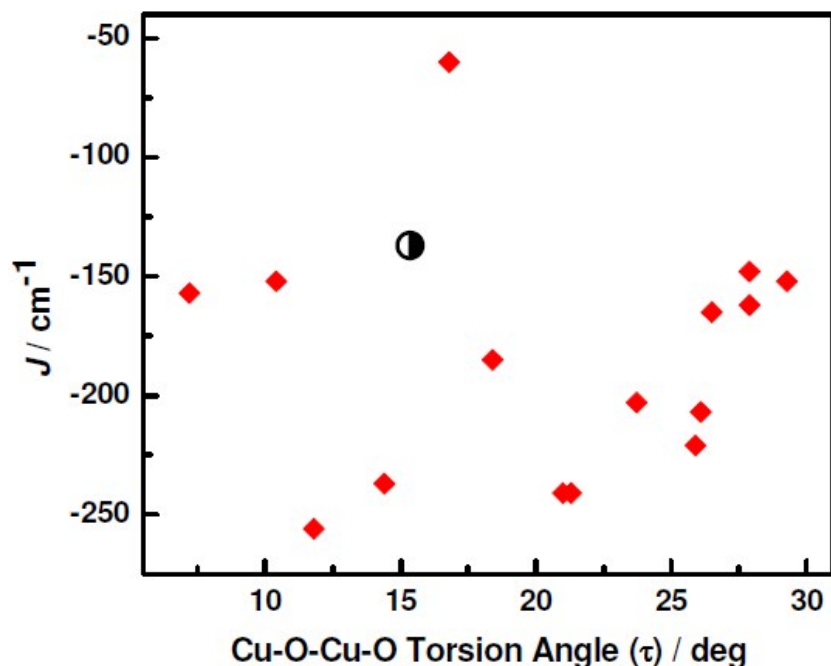

**Fig. S16**  $J$  versus Cu–O–Cu–O torsion angle ( $\tau$ ) in the trinuclear  $\text{Cu}^{\text{II}}\text{Cu}^{\text{II}}\text{Cu}^{\text{II}}$  compounds where the two copper(II) centres in a  $\text{Cu}^{\text{II}}\dots\text{Cu}^{\text{II}}$  pair are bridged by solely bis( $\mu_2$ -phenoxo) moiety (Table S5): No straightforward correlation is possible. Red filled squares: Data of previous compounds. Black-white half-filled circle: Data of compound 1.

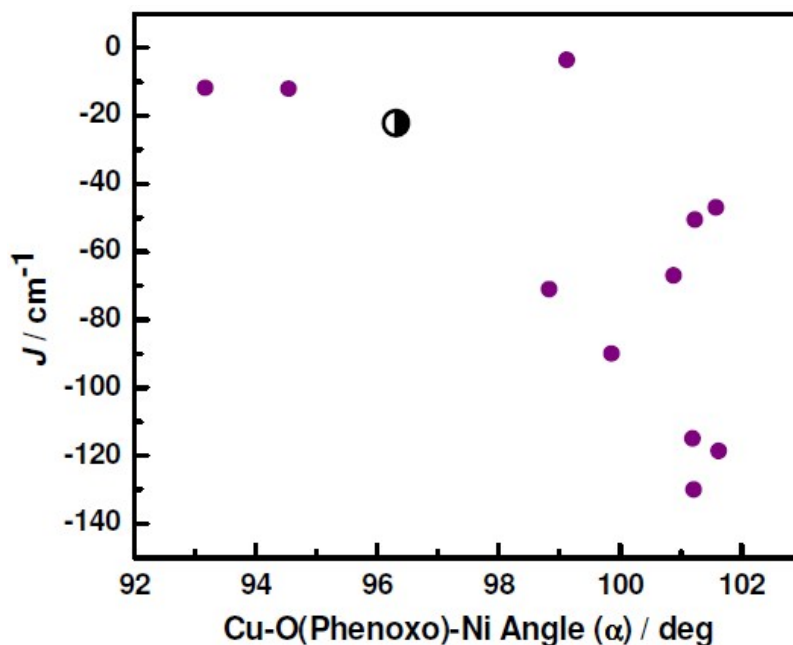

**Fig. S17**  $J$  versus Cu–O(Phenoxo)–Ni bridge angle ( $\alpha$ ) in the compounds where copper(II) and nickel(II) centres are bridged by solely bis( $\mu_2$ -phenoxo) moiety (Table S6): No straightforward correlation is possible. Violet filled circles: Data of previous compounds. Black-white half-filled circle: Data of compound 2.

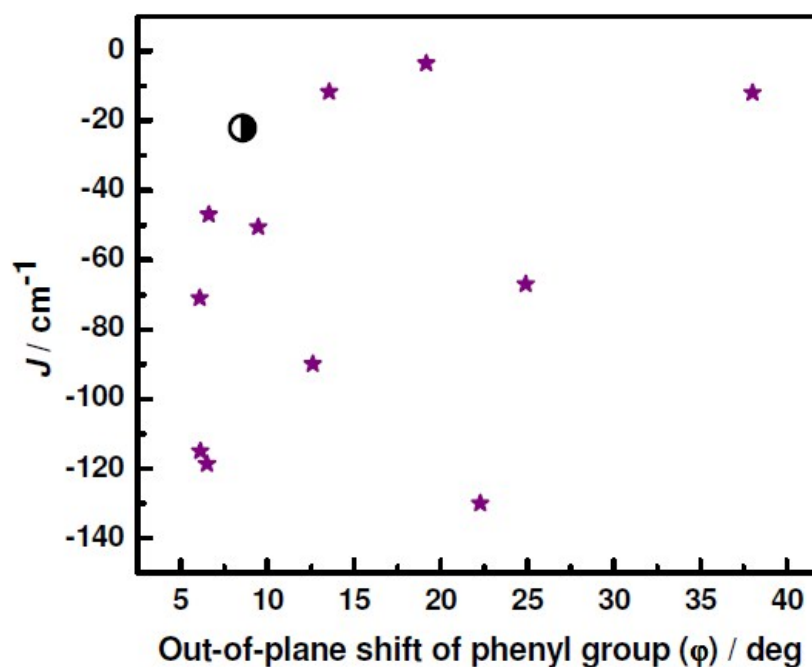

**Fig. S18**  $J$  versus Out-of-plane shift of phenyl group ( $\phi$ ) in the compounds where copper(II) and nickel(II) centres are bridged by solely bis( $\mu_2$ -phenoxo) moiety (Table S6): No straightforward correlation is possible. Violet filled stars: Data of previous compounds. Black-white half-filled circle: Data of compound 2.

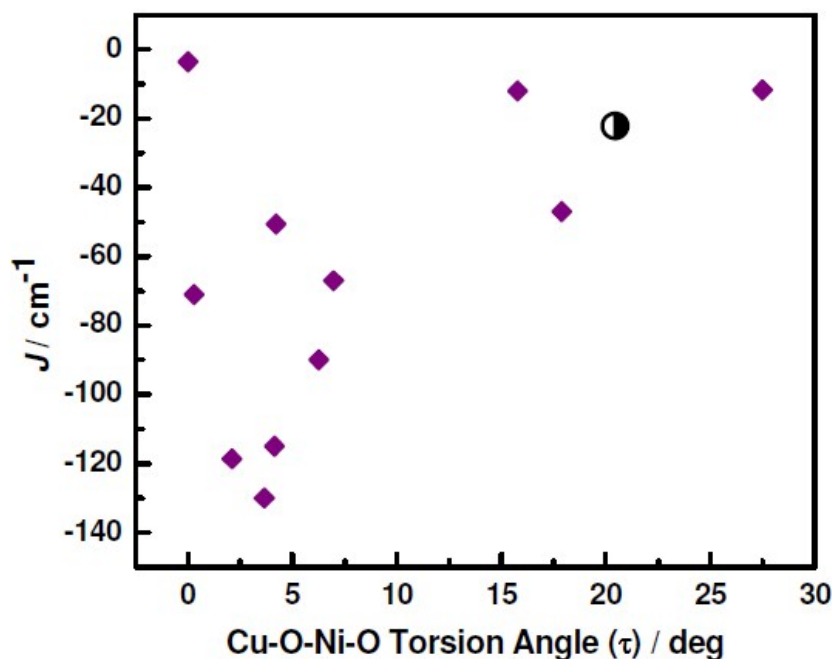

**Fig. S19**  $J$  versus Cu-O-Ni-O torsion angle ( $\tau$ ) in the compounds where copper(II) and nickel(II) centres are bridged by solely bis( $\mu_2$ -phenoxo) moiety (Table S6): No straightforward correlation is possible. Violet filled squares: Data of previous compounds. Black-white half-filled circle: Data of compound 2.



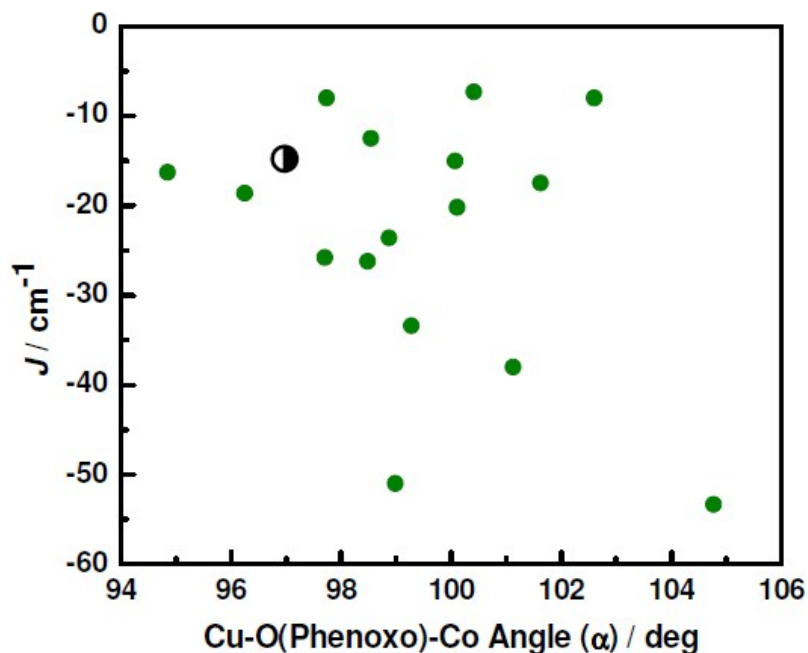

**Fig. S20**  $J$  versus Cu–O(Phenoxo)–Co bridge angle ( $\alpha$ ) in the compounds where copper(II) and cobalt(II) centres are bridged by solely bis( $\mu_2$ -phenoxo) moiety (Table S7): No straightforward correlation is possible. Green filled circles: Data of previous compounds. Black-white half-filled circle: Data of compound **3**.

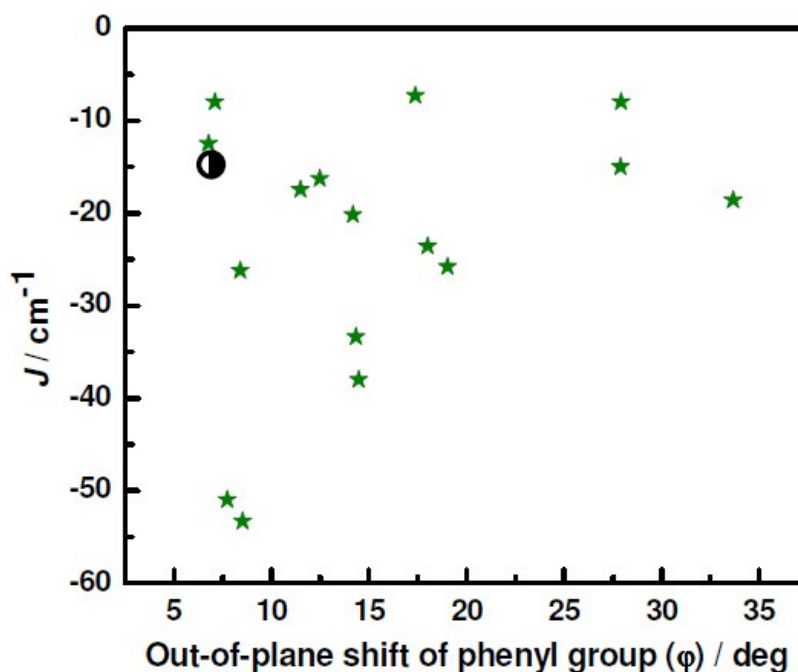

**Fig. S21**  $J$  versus Out-of-plane shift of phenyl group ( $\phi$ ) in the compounds where copper(II) and cobalt(II) centres are bridged by solely bis( $\mu_2$ -phenoxo) moiety (Table S7): No straightforward correlation is possible. Green filled stars: Data of previous compounds. Black-white half-filled circle: Data of compound **3**.

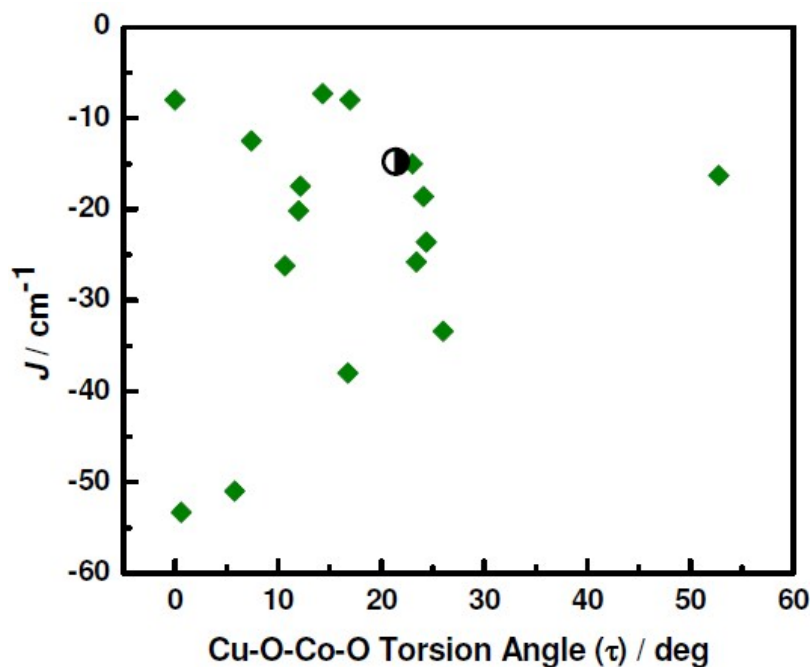

**Fig. S22**  $J$  versus Cu–O–Co–O torsion angle ( $\tau$ ) in the compounds where copper(II) and cobalt(II) centres are bridged by solely bis( $\mu_2$ -phenoxo) moiety (Table S7): No straightforward correlation is possible. Green filled squares: Data of previous compounds. Black-white half-filled circle: Data of compound **3**.

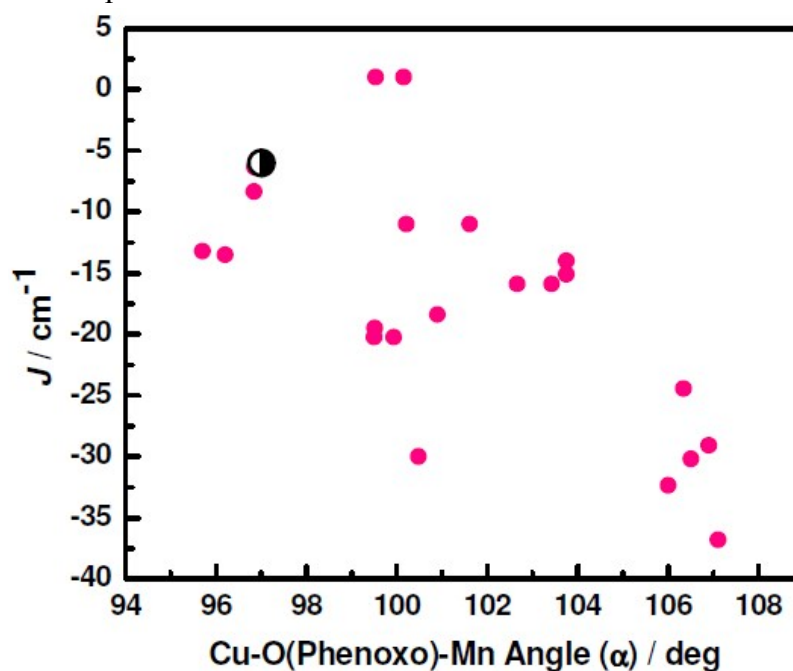

**Fig. S23**  $J$  versus Cu–O(Phenoxo)–Mn bridge angle ( $\alpha$ ) in the compounds where copper(II) and manganese(II) centres are bridged by solely bis( $\mu_2$ -phenoxo) moiety (Table S8): No straightforward correlation is possible. Pink filled circles: Data of previous compounds. Black-white half-filled circle: Data of compound **5**.

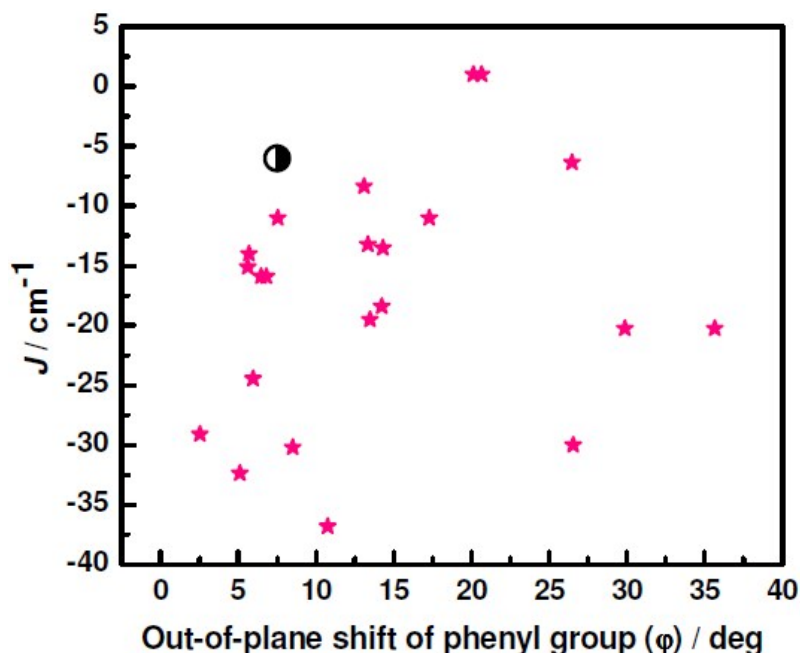

**Fig. S24**  $J$  versus Out-of-plane shift of phenyl group ( $\phi$ ) in the compounds where copper(II) and manganese(II) centres are bridged by solely bis( $\mu_2$ -phenoxo) moiety (Table S8): No straightforward correlation is possible. Pink filled stars: Data of previous compounds. Black-white half-filled circle: Data of compound 5.

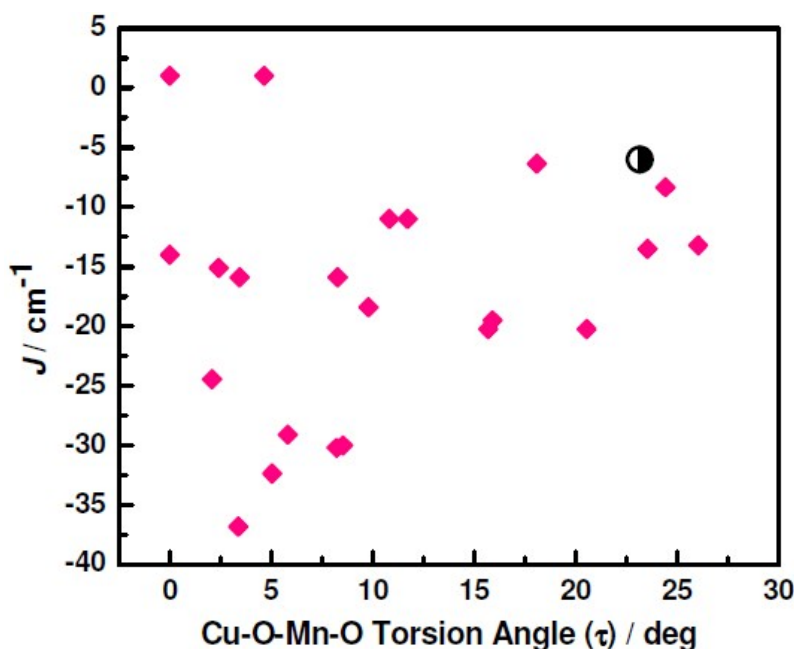

**Fig. S25**  $J$  versus Cu-O-Mn-O torsion angle ( $\tau$ ) in the compounds where copper(II) and manganese(II) centres are bridged by solely bis( $\mu_2$ -phenoxo) moiety (Table S8): No straightforward correlation is possible. Pink filled squares: Data of previous compounds. Black-white half-filled circle: Data of compound 5.

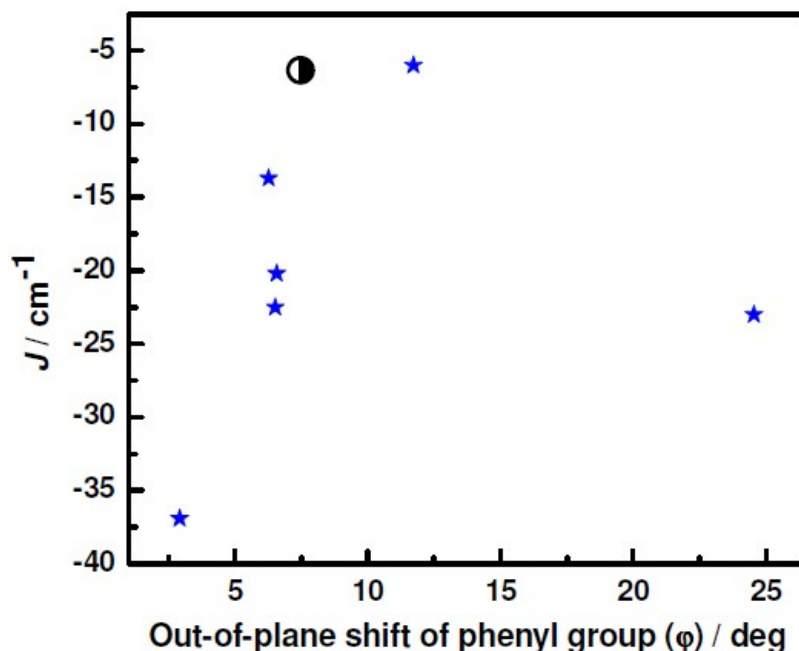

**Fig. S26**  $J$  versus Out-of-plane shift of phenyl group ( $\phi$ ) in the compounds where copper(II) and iron(II) centres are bridged by solely bis( $\mu_2$ -phenoxo) moiety (Table 5 in the text): No straightforward correlation is possible. Blue filled stars: Data of previous compounds. Black-white half-filled circle: Data of compound 4.

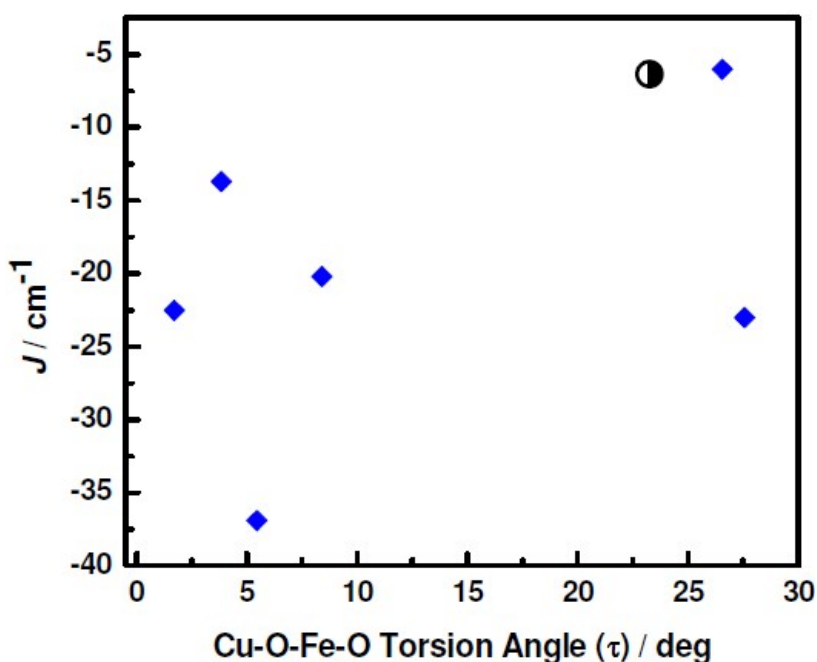

**Fig. S27**  $J$  versus Cu-O-Fe-O torsion angle ( $\tau$ ) in the compounds where copper(II) and iron(II) centres are bridged by solely bis( $\mu_2$ -phenoxo) moiety (Table 5 in the text): No straightforward correlation is possible. Blue filled squares: Data of previous compounds. Black-white half-filled circle: Data of compound 4.

**Table S1** Some structural parameters (lengths in Å and angles in °) around Cu1 and Cu2 centres in **1–6**

|                                     |                | Cu <sup>II</sup> Cu <sup>II</sup> Cu <sup>II</sup> | Cu <sup>II</sup> Ni <sup>II</sup> Cu <sup>II</sup> | Cu <sup>II</sup> Co <sup>II</sup> Cu <sup>II</sup> | Cu <sup>II</sup> Fe <sup>II</sup> Cu <sup>II</sup> | Cu <sup>II</sup> Mn <sup>II</sup> Cu <sup>II</sup> | Cu <sup>II</sup> Zn <sup>II</sup> Cu <sup>II</sup> |
|-------------------------------------|----------------|----------------------------------------------------|----------------------------------------------------|----------------------------------------------------|----------------------------------------------------|----------------------------------------------------|----------------------------------------------------|
|                                     |                | (1)                                                | (2)                                                | (3)                                                | (4)                                                | (5)                                                | (6)                                                |
| Bond Lengths                        | Cu1–O1         | 1.910(5)                                           | 1.906(2)                                           | 1.916(4)                                           | 1.915(2)                                           | 1.920(2)                                           | 1.928(5)                                           |
|                                     | Cu1–O2         | 1.912(5)                                           | 1.909(3)                                           | 1.908(5)                                           | 1.908(2)                                           | 1.912(2)                                           | 1.920(5)                                           |
|                                     | Cu1–O5A/O8/O8A | 2.596(6)                                           | 2.644(13)                                          | 2.597(45)                                          | 2.749(9)                                           | 2.723(14)                                          | 2.802(16)                                          |
|                                     | Cu1–N1         | 1.906(6)                                           | 1.911(3)                                           | 1.932(6)                                           | 1.918(3)                                           | 1.920(3)                                           | 1.935(7)                                           |
|                                     | Cu1–N2         | 1.902(6)                                           | 1.917(4)                                           | 1.928(6)                                           | 1.930(3)                                           | 1.929(3)                                           | 1.942(7)                                           |
|                                     | Cu2–O3         | 1.916(5)                                           | 1.901(3)                                           | 1.906(5)                                           | –                                                  | –                                                  | –                                                  |
|                                     | Cu2–O4         | 1.895(5)                                           | 1.906(3)                                           | 1.918(4)                                           | –                                                  | –                                                  | –                                                  |
|                                     | Cu2–O10        | 2.868(7)                                           | –                                                  | –                                                  | –                                                  | –                                                  | –                                                  |
|                                     | Cu2–O15        | –                                                  | –                                                  | 2.671(12)                                          | –                                                  | –                                                  | –                                                  |
|                                     | Cu2–N3         | 1.889(6)                                           | 1.910(3)                                           | 1.925(6)                                           | –                                                  | –                                                  | –                                                  |
|                                     | Cu2–N4         | 1.896(6)                                           | 1.906(3)                                           | 1.914(5)                                           | –                                                  | –                                                  | –                                                  |
|                                     | Bond Angles    | O2–Cu1–N1                                          | 175.3(3)                                           | 177.02(14)                                         | 175.2(3)                                           | 176.98(13)                                         | 177.24(11)                                         |
| O1–Cu1–N2                           |                | 175.6(3)                                           | 167.02(16)                                         | 166.4(3)                                           | 168.16(12)                                         | 168.57(10)                                         | 168.8(3)                                           |
| O1–Cu1–O2                           |                | 81.3(2)                                            | 83.87(11)                                          | 83.79(18)                                          | 83.28(10)                                          | 84.10(18)                                          | 83.2(2)                                            |
| O1–Cu1–O5A/O8/O8A                   |                | 89.947(222)                                        | 91.441(291)                                        | 104.169(679)                                       | 92.124(217)                                        | 88.852(419)                                        | 89.491(462)                                        |
| O1–Cu1–N1                           |                | 96.3(2)                                            | 95.53(13)                                          | 95.0(2)                                            | 95.74(11)                                          | 95.27(10)                                          | 95.8(2)                                            |
| O2–Cu1–O5A/O8/O8A                   |                | 87.465(200)                                        | 88.608(288)                                        | 88.095(738)                                        | 84.967(247)                                        | 99.855(622)                                        | 87.259(535)                                        |
| O2–Cu1–N2                           |                | 96.4(2)                                            | 94.40(13)                                          | 94.2(2)                                            | 94.68(11)                                          | 94.72(10)                                          | 94.8(2)                                            |
| O5A/O8/O8A–Cu1–N1                   |                | 88.457(233)                                        | 94.326(293)                                        | 96.66(74)                                          | 97.937(249)                                        | 82.818(621)                                        | 94.862(548)                                        |
| O5A/O8/O8A–Cu1–N2                   |                | 93.717(249)                                        | 101.409(297)                                       | 89.127(624)                                        | 99.348(225)                                        | 102.545(433)                                       | 101.449(491)                                       |
| N1–Cu1–N2                           |                | 86.2(3)                                            | 85.53(15)                                          | 85.9(3)                                            | 85.70(13)                                          | 85.36(11)                                          | 85.8(3)                                            |
| O3–Cu2–N4                           |                | 173.1(3)                                           | 176.07(14)                                         | 178.6(3)                                           | –                                                  | –                                                  | –                                                  |
| O4–Cu2–N3                           |                | 172.4(3)                                           | 170.07(14)                                         | 167.9(3)                                           | –                                                  | –                                                  | –                                                  |
| O3–Cu2–O4                           |                | 84.1(2)                                            | 84.08(11)                                          | 83.05(19)                                          | –                                                  | –                                                  | –                                                  |
| O3–Cu2–O10                          |                | 81.410(192)                                        | –                                                  | –                                                  | –                                                  | –                                                  | –                                                  |
| O3–Cu2–O15                          |                | –                                                  | –                                                  | 88.041(303)                                        | –                                                  | –                                                  | –                                                  |
| O3–Cu2–N3                           |                | 95.4(2)                                            | 95.16(13)                                          | 95.5(2)                                            | –                                                  | –                                                  | –                                                  |
| O4–Cu2–O10                          |                | 104.947(219)                                       | –                                                  | –                                                  | –                                                  | –                                                  | –                                                  |
| O4–Cu2–O15                          |                | –                                                  | –                                                  | 105.51(30)                                         | –                                                  | –                                                  | –                                                  |
| O4–Cu2–N4                           |                | 95.4(3)                                            | 95.59(13)                                          | 96.2(2)                                            | –                                                  | –                                                  | –                                                  |
| O10–Cu2–N3                          |                | 82.378(247)                                        | –                                                  | –                                                  | –                                                  | –                                                  | –                                                  |
| O10–Cu2–N4                          |                | 92.100(251)                                        | –                                                  | –                                                  | –                                                  | –                                                  | –                                                  |
| O15–Cu2–N3                          | –              | –                                                  | 86.412(304)                                        | –                                                  | –                                                  | –                                                  |                                                    |
| O15–Cu2–N4                          | –              | –                                                  | 91.051(308)                                        | –                                                  | –                                                  | –                                                  |                                                    |
| N3–Cu2–N4                           | 86.0(3)        | 85.84(15)                                          | 85.5(2)                                            | –                                                  | –                                                  | –                                                  |                                                    |
| Discrimination parameter ( $\tau$ ) | Cu1            | 0.005                                              | 0.1667                                             | 0.147                                              | 0.147                                              | 0.144                                              | 0.148                                              |
|                                     | Cu2            | 0.012                                              | –                                                  | 0.179                                              | –                                                  | –                                                  | –                                                  |

**Table S2** The geometries of the hydrogen bonds in  $[\{\text{Cu}^{\text{II}}\text{L}(\text{ClO}_4)\}_2\text{Cu}^{\text{II}}(\text{H}_2\text{O})]\cdot 2\text{H}_2\text{O}$  (**1**) and  $[\{\text{Cu}^{\text{II}}\text{L}(\text{ClO}_4)\}\{\text{Ni}^{\text{II}}(\text{H}_2\text{O})_2\}\{\text{Cu}^{\text{II}}\text{L}\}]\text{ClO}_4\cdot\text{CH}_3\text{COCH}_3$  (**2**) (distances in Å and angles in °). Symmetry for **1**: E, 1-x, 2-y, 1-z. Symmetry for **2**: E, 2-x, 1-y, 1-z.

| D-H····A         | H····A   |          | D····A   |          | D-H····A |          |
|------------------|----------|----------|----------|----------|----------|----------|
|                  | <b>1</b> | <b>2</b> | <b>1</b> | <b>2</b> | <b>1</b> | <b>2</b> |
| C32-H32B····O10E | 2.512    | –        | 3.382    | –        | 148.33   | –        |
| O5-H5A····O7     | 1.917    | –        | 2.707    | –        | 153.94   | –        |
| O5-H5B····O10    | 2.089    | –        | 2.919    | –        | 162.57   | –        |
| O5-H5B····O13E   | –        | 1.909    | –        | 2.779    | –        | 171.25   |
| O6-H6A····O11E   | –        | 2.017    | –        | 2.841    | –        | 157.28   |

**Table S3** The geometries of the hydrogen bonds in  $[\{\text{Cu}^{\text{II}}\text{L}(\text{ClO}_4)\}_2\text{Fe}^{\text{II}}(\text{CH}_3\text{OH})_2]$  (**4**),  $[\{\text{Cu}^{\text{II}}\text{L}(\text{ClO}_4)\}_2\text{Mn}^{\text{II}}(\text{CH}_3\text{OH})_2]$  (**5**) and  $[\{\text{Cu}^{\text{II}}\text{L}(\text{ClO}_4)\}_2\text{Zn}^{\text{II}}(\text{CH}_3\text{OH})_2]$  (**6**) (distances in Å and angles in °). Symmetry for **4**: E, 0.5-x, -0.5+y, 0.5-z. Symmetry for **5**: E, 0.5+x, -0.5+y, z. Symmetry for **6**: E, 1.5-x, -0.5+y, 0.5-z.

| D-H····A      | H····A   |          |          | D····A   |          |          | D-H····A |          |          |
|---------------|----------|----------|----------|----------|----------|----------|----------|----------|----------|
|               | <b>4</b> | <b>5</b> | <b>6</b> | <b>4</b> | <b>5</b> | <b>6</b> | <b>4</b> | <b>5</b> | <b>6</b> |
| O3-H3A····O4E | 2.074    | 2.081    | 2.104    | 2.878    | 2.849    | 2.899    | 159.70   | 151.69   | 156.52   |













**Table S5** Magnetic exchange integral and some relevant structural parameters of the trinuclear Cu<sup>II</sup>Cu<sup>II</sup>Cu<sup>II</sup> compounds where the two copper(II) centres in a Cu<sup>II</sup>...Cu<sup>II</sup> pair are bridged by solely bis( $\mu_2$ -phenoxo) moiety:

| Compound No. | CSD Code | $J$ (cm <sup>-1</sup> ) | Average Cu–O(Phenoxo)–Cu bridge angle ( $\alpha$ ) (deg) | Out-of-plane shift of phenyl group ( $\phi$ ) (deg) | Cu–O–Cu–O torsion angle ( $\tau$ ) (deg) | Reference |
|--------------|----------|-------------------------|----------------------------------------------------------|-----------------------------------------------------|------------------------------------------|-----------|
| 1            | DAHVEP02 | –152                    | 94.07                                                    | 27.70                                               | 29.28                                    | 1(a)      |
| 2            | ITIFOH   | –203                    | 98.04                                                    | 31.67                                               | 23.73                                    | 1(b)      |
| 3            | WUYFUS   | –60                     | 101.52                                                   | 10.25                                               | 16.79                                    | 1(c)      |
| 4            | LIFSAV   | –185                    | 97.45                                                    | 31.0                                                | 18.4                                     | 1(d)      |
| 5            | IBERIQ   | –241                    | 97.6                                                     | 18.1                                                | 21.3                                     | 1(e)      |
| 6            | FIDZUO   | –241                    | 98.35                                                    | 18.8                                                | 21.0                                     | 1(f)      |
| 7            | FEZTEK   | –157                    | 98.35                                                    | 30.0                                                | 7.2                                      | 1(g)      |
| 8            | VAVQOZ   | –237                    | 99.55                                                    | 24.0                                                | 14.4                                     | 1(h)      |
| 9            | IKOQUU   | –256                    | 101.1                                                    | 20.4                                                | 11.8                                     | 1(i)      |
| 10           | FIDZOI   | –152                    | 101.0                                                    | 25.0                                                | 10.4                                     | 1(f)      |
| 11           | RAJNAT   | –148                    | 96.3                                                     | 2.2                                                 | 27.9                                     | 1(j)      |
| 12           | RAJNEX   | –162                    | 96.3                                                     | 2.1                                                 | 27.9                                     | 1(j)      |
| 13           | RAJNIB   | –165                    | 96.85                                                    | 3.1                                                 | 26.5                                     | 1(j)      |
| 14           | RAJNOH   | –207                    | 97.65                                                    | 4.7                                                 | 26.1                                     | 1(j)      |
| 15           | RAJNUN   | –221                    | 98.8                                                     | 6.3                                                 | 25.9                                     | 1(j)      |
| 16           | -----    | –137                    | 97.97                                                    | 6.88                                                | 15.43                                    | This work |

**Table S6** Magnetic exchange integral and some relevant structural parameters of the systems where copper(II) and nickel(II) centres are bridged by solely bis( $\mu_2$ -phenoxo) moiety

| <b>Compound No.</b> | <b>CSD Code</b> | <b><math>J</math> (cm<sup>-1</sup>)</b> | <b>Average Cu–O(Phenoxo)–Ni bridge angle (<math>\alpha</math>) (deg)</b> | <b>Out-of-plane shift of phenyl group (<math>\phi</math>) (deg)</b> | <b>Cu–O–Ni–O torsion angle (<math>\tau</math>) (deg)</b> | <b>Reference</b> |
|---------------------|-----------------|-----------------------------------------|--------------------------------------------------------------------------|---------------------------------------------------------------------|----------------------------------------------------------|------------------|
| <b>1</b>            | KAJFEG          | –130                                    | 101.21                                                                   | 22.28                                                               | 3.65                                                     | 2(a)             |
| <b>2</b>            | GIWYEQ          | –118.6                                  | 101.62                                                                   | 6.5                                                                 | 2.11                                                     | 2(b)             |
| <b>3</b>            | KAHVAQ          | –115.0                                  | 101.19                                                                   | 6.12                                                                | 4.14                                                     | 2(a)             |
| <b>4</b>            | LINWIO          | –47.0                                   | 101.58                                                                   | 6.6                                                                 | 17.88                                                    | 2(c)             |
| <b>5</b>            | IXAZUC          | –50.6                                   | 101.23                                                                   | 9.46                                                                | 4.22                                                     | 2(d)             |
| <b>6</b>            | UKIPOT          | –67.0                                   | 100.88                                                                   | 24.91                                                               | 6.97                                                     | 2(e)             |
| <b>7</b>            | ZOJFEJ          | –90.0                                   | 99.86                                                                    | 12.6                                                                | 6.27                                                     | 2 (f)            |
| <b>8</b>            | BIHZEX          | –71.0                                   | 98.83                                                                    | 6.08                                                                | 0.28                                                     | 2(g)             |
| <b>9</b>            | UDUWEV          | –12.0                                   | 94.54                                                                    | 38.01                                                               | 15.78                                                    | 2(h)             |
| <b>10</b>           | DEWPAW          | –11.8                                   | 93.17                                                                    | 13.55                                                               | 27.49                                                    | 2(i)             |
| <b>11</b>           | YOXKED          | –3.53                                   | 99.12                                                                    | 19.17                                                               | 0.00                                                     | 2(j)             |
| <b>12</b>           | -----           | –22.16                                  | 96.32                                                                    | 8.587                                                               | 20.39                                                    | This work        |

**Table S7** Magnetic exchange integral and some relevant structural parameters of the systems where copper(II) and cobalt(II) centres are bridged by solely bis( $\mu_2$ -phenoxo) moiety

| <b>Compound No.</b> | <b>CSD Code</b> | <b><math>J</math> (cm<sup>-1</sup>)</b> | <b>Average Cu–O(Phenoxo)–Co bridge angle (<math>\alpha</math>) (deg)</b> | <b>Out-of-plane shift of phenyl group (<math>\varphi</math>) (deg)</b> | <b>Cu–O–Co–O torsion angle (<math>\tau</math>) (deg)</b> | <b>Reference</b> |
|---------------------|-----------------|-----------------------------------------|--------------------------------------------------------------------------|------------------------------------------------------------------------|----------------------------------------------------------|------------------|
| <b>1</b>            | CEPLEP          | –12.5                                   | 98.54                                                                    | 6.78                                                                   | 7.38                                                     | 3(a)             |
| <b>2</b>            | CPRECO          | –16.3                                   | 94.84                                                                    | 12.48                                                                  | 52.76                                                    | 3(b)             |
| <b>3</b>            | DEXRAA          | –8                                      | 102.60                                                                   | 7.11                                                                   | 0.00                                                     | 3(c)             |
| <b>4</b>            | FIHFIL          | –15                                     | 100.07                                                                   | 27.88                                                                  | 23.03                                                    | 3(d)             |
| <b>5</b>            | ILAKIP          | –20.2                                   | 100.11                                                                   | 14.17                                                                  | 11.97                                                    | 3(e)             |
| <b>6</b>            | IXAZOW          | –26.2                                   | 98.48                                                                    | 8.41                                                                   | 10.64                                                    | 2(d)             |
| <b>7</b>            | MUQNES          | –51                                     | 98.98                                                                    | 7.74                                                                   | 5.78                                                     | 3(f)             |
| <b>8</b>            | QADWUN          | –7.3                                    | 100.41                                                                   | 17.38                                                                  | 14.33                                                    | 3(g)             |
| <b>9</b>            | TEGCOY          | –53.3                                   | 104.77                                                                   | 8.53                                                                   | 0.59                                                     | 3(h)             |
| <b>10</b>           | UDUWAR          | –8                                      | 97.73                                                                    | 27.92                                                                  | 16.98                                                    | 3(i)             |
| <b>11</b>           | UDUWIZ          | –38                                     | 101.12                                                                   | 14.48                                                                  | 16.76                                                    | 3(i)             |
| <b>12</b>           | WIVHAM          | –18.6                                   | 96.25                                                                    | 33.66                                                                  | 24.10                                                    | 3(j)             |
| <b>13</b>           | WIVHEQ          | –25.8                                   | 97.70                                                                    | 19.03                                                                  | 23.42                                                    | 3(j)             |
| <b>14</b>           | WIVHEQ01        | –23.6                                   | 98.87                                                                    | 18.00                                                                  | 24.36                                                    | 3(j)             |
| <b>15</b>           | YEHVEN          | –17.45                                  | 101.62                                                                   | 11.49                                                                  | 12.15                                                    | 3(k)             |
| <b>16</b>           | ZOJQEW          | –33.4                                   | 99.28                                                                    | 14.34                                                                  | 26.02                                                    | 3(l)             |
| <b>17</b>           | -----           | –14.78                                  | 96.99                                                                    | 6.86                                                                   | 21.36                                                    | This work        |

**Table S8** Magnetic exchange integral and some relevant structural parameters of the systems where copper(II) and manganese(II) centres are bridged by solely bis( $\mu_2$ -phenoxo) moiety

| Compound No. | CSD Code | $J$ (cm <sup>-1</sup> )      | Average Cu–O(Phenoxo)–Mn bridge angle ( $\alpha$ ) (deg) | Out-of-plane shift of phenyl group ( $\varphi$ ) (deg) | Cu–O–Mn–O torsion angle ( $\tau$ ) (deg) | Reference |
|--------------|----------|------------------------------|----------------------------------------------------------|--------------------------------------------------------|------------------------------------------|-----------|
| 1            | GAJYOH   | –36.8                        | 107.11                                                   | 10.75                                                  | 3.36                                     | 4(a)      |
| 2            | VOBLAA   | –32.35                       | 106.00                                                   | 5.1                                                    | 5.04                                     | 4(b)      |
| 3            | VOBLII   | –30.2                        | 106.51                                                   | 8.51                                                   | 8.21                                     | 4(b)      |
| 4            | BICCAT   | –29.1                        | 106.9                                                    | 2.54                                                   | 5.82                                     | 4(c)      |
| 5            | VOBKUT   | –24.45                       | 106.34                                                   | 5.96                                                   | 2.07                                     | 4(b)      |
| 6            | DEXQUT   | –14.0                        | 103.75                                                   | 5.69                                                   | 0.0                                      | 3(c)      |
| 7            | YUVRAJ   | –15.1                        | 103.75                                                   | 5.62                                                   | 2.41                                     | 4(d)      |
| 8            | MIXLEL   | –15.9                        | 103.42                                                   | 6.47                                                   | 3.43                                     | 4(e)      |
| 9            | BICBIA   | –15.9                        | 102.66                                                   | 6.8                                                    | 8.27                                     | 4(c)      |
| 10           | ILAKOV   | –11.0                        | 101.61                                                   | 7.55                                                   | 11.72                                    | 3(e)      |
| 11           | QEKFIW   | –18.4                        | 100.9                                                    | 14.23                                                  | 9.79                                     | 4(f)      |
| 12           | LEGJAI   | –11.0                        | 100.21                                                   | 17.29                                                  | 10.82                                    | 4(g)      |
| 13           | UKIPEJ   | –30.0                        | 100.48                                                   | 26.55                                                  | 8.53                                     | 2(e)      |
| 14           | HETZIQ   | –19.5                        | 99.51                                                    | 13.48                                                  | 15.91                                    | 4(h)      |
| 15           | YADNIB   | –8.35                        | 96.84                                                    | 13.1                                                   | 24.43                                    | 4(i)      |
| 16           | WATGON   | –13.5                        | 96.2                                                     | 14.31                                                  | 23.54                                    | 4(j)      |
| 17           | FAEPCU   | –13.2                        | 95.7                                                     | 13.34                                                  | 26.05                                    | 3(b)      |
| 18           | FANHUZ   | –20.25,<br>–20.25,<br>–6.35, | 99.5,<br>99.93,<br>96.85,                                | 29.88,<br>35.65,<br>26.48,                             | 20.54,<br>15.69,<br>18.09,               | 4(k)      |
| 19           | YOXKAZ   | 1.02                         | 100.15,<br>99.53                                         | 21.67,<br>20.13                                        | 4.62,<br>0.00                            | 2(j)      |
| 20           | –        | –6.02                        | 97.08                                                    | 7.46                                                   | 23.12                                    | This work |

## References

- 1 (a) S. Saha, A. Sasmal, C. Roy Choudhury, C. J. Gómez-García, E. Garribba and S. Mitra, *Polyhedron*, 2014, **69**, 262; (b) P. Talukder, S. Shit, A. Sasmal, S. R. Batten, B. Moubaraki, K. S. Murray and S. Mitra, *Polyhedron*, 2011, **30**, 1767; (c) S. Thakurta, C. Rizzoli, R. J. Butcher, C. J. Gómez-García, E. Garribba and S. Mitra, *Inorg. Chim. Acta*, 2010, **363**, 1395; (d) Y.-F. Song, G. A. van Albada, J. Tang, I. Mutikainen, U. Turpeinen, C. Massera, O. Roubeau, J. S. Costa, P. Gamez, and J. Reedijk, *Inorg. Chem.*, 2007, **46**, 4944; (e) X.-H. Bu, M. Du, Z.-L. Shang, R.-H. Zhang, D.-Z. Liao, M. Shionoya and T. Clifford, *Inorg. Chem.*, 2000, **39**, 4190; (f) Y. Song, P. Gamez, O. Roubeau, I. Mutikainen, U. Turpeinen and J. Reedijk, *Inorg. Chim. Acta*, 2005, **358**, 109; (g) M. Du, X.-J. Zhao, J.-H. Guo, X.-H. Bu and J. Ribas, *Eur. J. Inorg. Chem.*, 2005, 294; (h) Y. F. Song, G. A. van Albada, M. Quesada, I. Mutikainen, U. Turpeinen and J. Reedijk, *Inorg. Chem. Commun.*, 2005, **8**, 975; (i) Y. Song, P. Gamez, O. Roubeau, M. Lutz, A. L. Spek and J. Reedijk, *Eur. J. Inorg. Chem.*, 2003, 2924; (j) L. Botana, J. Ruiz, J. M. Seco, A. J. Mota, A. Rodríguez-Dí'eguez, R. Sillanpää and E. Colacio, *Dalton Trans.*, 2011, **40**, 12462.
  
- 2 (a) C. N. Verani, E. Rentschler, T. Weyhermüller, E. Bill and P. Chaudhuri, *J. Chem. Soc., Dalton Trans.*, 2000, 251; (b) C. N. Verani, T. Weyhermüller, E. Rentschler, E. Bill and P. Chaudhuri, *Chem. Commun.*, 1998, 2475; (c) M. Yonemura, M. Ohba, K. Takahashi, H. Ōkawa and D. E. Fenton, *Inorg. Chim. Acta*, 1998, **283**, 79; (d) R.-J. Tao, C.-Z. Mei, S.-Q. Zang, Q.-L. Wang, J.-Y. Niu and D.-Z. Liao, *Inorg. Chim. Acta*, 2004, **357**, 1985; (e) A. Hori, Y. Mitsuka, M. Ohba and H. Ōkawa, *Inorg. Chim. Acta*, 2002, **337**, 113; (f) T. Aono, H. Wada, Y.-I. Aratake, N. Matsumoto, H. Ōkawa and Y. Matsuda, *Dalton Trans*, 1996, 25; (g) I. Morgenstern-Badarau, M. Rerat, O. Khan, J. Jaud and J. Galy, *Inorg. Chem.*, 1982, **21**, 3050; (h) M. Yonemura, K. Arimura, K. Inoue, N. Usuki, M. Ohba and H. Ōkawa, *Inorg. Chem.*, 2002, **41**, 582; (i) Y. Journaux, O. Kahn, I. Morgenstern-Badarau, J. Galy, J. Jaud, A. Bencini and D. Gatteschi, *J. Am. Chem. Soc.*, 1985, **107**, 6305; (j) S. Mondal, S. Mandal, L. Carrella, A. Jana, M. Fleck, A. Köhn, E. Rentschler and S. Mohanta, *Inorg. Chem.*, 2015, **54**, 117.
  
- 3 (a) R.-J. Tao, F.-A. Li, S.-Q. Zang, Y.-X. Cheng, Q.-L. Wang, J.-Y. Niu and D.-Z. Liao, *Polyhedron*, 2006, **25**, 2153; (b) C. J. O'connor, D. P. Freyberg and E. Sinn, *Inorg. Chem.*, 1979, **18**, 1077; (c) M. Nayak, R. Koner, H.-H. Lin, U. Flörke, H.-H. Wei, and S. Mohanta, *Inorg. Chem.*, 2006, **45**, 10764; (d) G. A. Brewer and E. Sinn, *Inorg. Chem.*, 1987, **26**, 1529; (e) S. Osa, Y. Sunatsuki, Y. Yamamoto, M. Nakamura, T. Shimamoto, N. Matsumoto, and N. Re, *Inorg. Chem.*, 2003, **42**, 5507; (f) A. Gutiérrez, M. F. Perpiñán, A. E. Sánchez, M. C. Torralba and M. R. Torres, *Inorg. Chim. Acta*, 2010, **363**, 1837; (g) Y. Sunatsuki, T. Matsuo, M. Nakamura, F. Kai, N. Matsumoto and J.-P. Tuchagues, *Bull. Chem. Soc. Jpn.*, 1998, **71**, 2611; (h) J.-P. Costes, R. Gheorghe, M.



- Andruh, S. Shovac and J.-M. C. Juand, *New J. Chem.*, 2006, **30**, 572; (i) M. Yonemura, K. Arimura, K. Inoue, N. Usuki, M. Ohba and H. Ohkawa, *Inorg. Chem.*, 2002, **41**, 582; (j) S. Biswas, C. J. Gómez-García, J. M. Clemente-Juan, S. Benmansour and A. Ghosh, *Inorg. Chem.*, 2014, **53**, 2441; (k) R.-J. Tao, F.-A. Li, S.-Q. Zang, Y.-X. Cheng, Q.-L. Wang, J.-Y. Niu and D.-Z. Liao, *J. Coord. Chem.*, 2006, **59**, 901; (l) S. Ghosh, G. Aromí, P. Gamez and A. Ghosh, *Eur. J. Inorg. Chem.*, 2014, 3341.
- 4 (a) D. G. Branzea, A. M. Madalan, S. Ciattini, N. Avarvari, A. Caneschi and M. Andruh, *New J. Chem.*, 2010, **34**, 2479; (b) D. G. Branzea, A. Guerri, O. Fabelo, C. Ruiz-Pérez, L.-M. Chamoreau, C. Sangregorio, A. Caneschi and M. Andruh, *Cryst. Growth Des.*, 2008, **8**, 941; (c) A. Biswas, L. Mandal, S. Mondal, C. R. Lucas and S. Mohanta, *CrystEngComm.*, 2013, **15**, 5888; (d) A. Biswas, M. Ghosh, P. Lemoine, S. Sarkar, S. Hazra and S. Mohanta, *Eur. J. Inorg. Chem.*, 2010, 3125; (e) M. Nayak, S. Hazra, P. Lemoine, R. Koner, C. R. Lucas and S. Mohanta, *Polyhedron*, 2008, **27**, 1201; (f) L. Bo, Z. Hong, P. Zhi-Quan, S. You, W. Cheng-Gang, Z. Han-Ping, H. Jing-Dong and C. Ru-An, *J. Coord. Chem.*, 2006, **59**, 1271; (g) R. Ruiz, F. Lloret, M. Julve and J. Faus, *Inorg. Chim. Acta*, 1993, **213**, 261; (h) D. Visinescu, J.-P. Sutter, C. Ruiz-Pérez and M. Andruh, *Inorg. Chim. Acta*, 2006, **359**, 433; (i) M. Pascu, F. Lloret, N. Avarvari, M. Julve and M. Andruh, *Inorg. Chem.*, 2004, **43**, 5189; (j) H. Ōkawa, J. Nishio, M. Ohba, M. Tadokoro, N. Matsumoto, M. Koikawa, S. Kida and D. E. Fenton, *Inorg. Chem.*, 1993, **32**, 2949; (k) S. Biswas, S. Naiya, C. J. Gomez-Garcia and A. Ghosh, *Dalton Trans.*, 2012, **41**, 462.
